# Supplementary material for: Three-component D–A hybrid heterostructures with enhanced photochromic, photomodulated luminescence and selective anion-sensing properties
Source: Royal Society of Chemistry journal article supplement (doi:10.1039/d0dt02390f), 2020-01-01
Supplement: d0dt02390f1.pdf [file d0dt02390f1.pdf]

Supporting Information for

## Three-component D-A hybrid heterostructures with enhanced photochromic, photomodulated luminescent and selectively anion-sensing properties

Meng-Hua Li<sup>a</sup>, Shu-Li Lv<sup>a</sup>, Ming-Hua You<sup>b</sup> and Mei-Jin Lin<sup>a, c, d\*</sup>

<sup>a</sup> State Key Laboratory of Photocatalysis on Energy and Environment, College of Chemistry, Fuzhou University, China, 350116.

E-mail: meijin\_lin@fzu.edu.cn.

<sup>b</sup> College of Zhicheng, Fuzhou University, China, 350002.

<sup>c</sup> College of Materials Science and Engineering, Fuzhou University, China, 350116

<sup>d</sup> Fujian Provincial Key Laboratory of Electrochemical Energy Storage Materials, Fuzhou University, Fuzhou, Fujian, 350002, China

### Table of Contents:

|                                                                                        |     |
|----------------------------------------------------------------------------------------|-----|
| 1. The additional crystal figure for 1-D channel and electron transfer                 | S2  |
| 2. Crystal data and structure refinement                                               | S3  |
| 3. Infrared spectral analysis                                                          | S4  |
| 4. Thermo-gravimetric analysis (TG)                                                    | S5  |
| 5. X-ray powder diffraction analysis                                                   | S6  |
| 6. Luminescence properties and sensing of Cr <sub>2</sub> O <sub>7</sub> <sup>2-</sup> | S7  |
| 7. XPS for hybrid <b>1</b>                                                             | S8  |
| 8. EDS analysis of hybrid <b>1</b>                                                     | S10 |

# 1. The additional crystal figure for 1-D channel and electron transfer

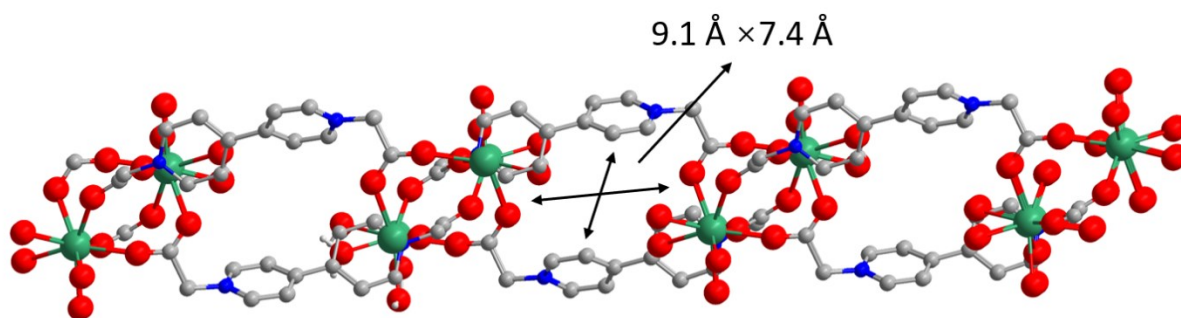

Fig. S1. The 1-D channels for hybrid 1 view along *b*-axis.

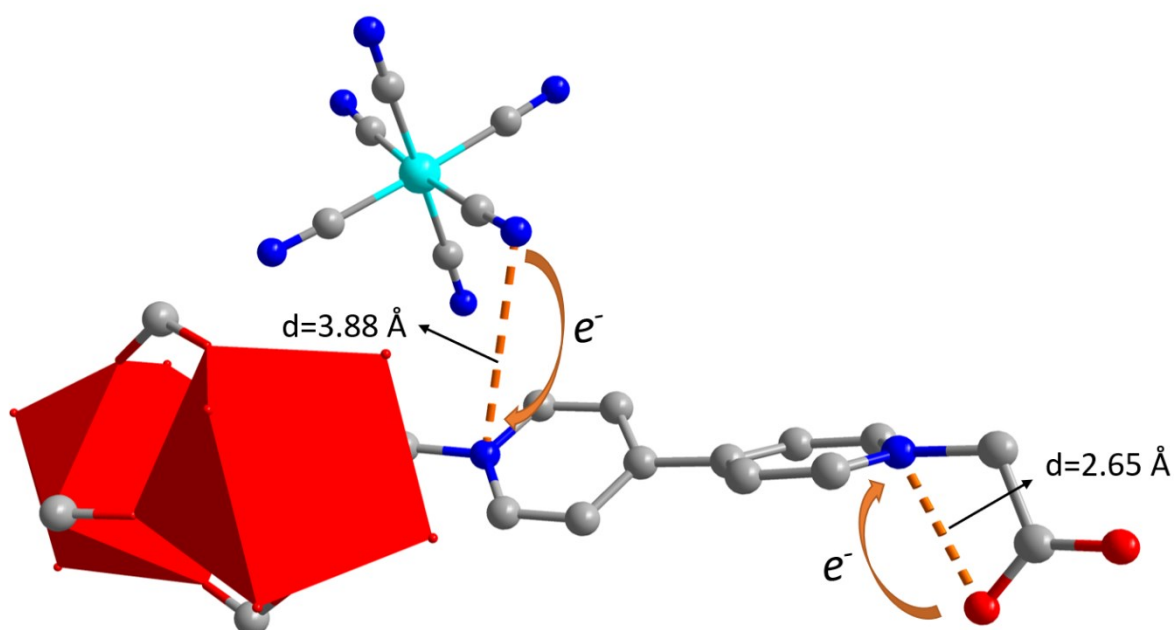

Fig. S2. The electron transfer orientation diagrams of  $[\text{Co}(\text{CN})_6]^{3-}$  and Bcbpy ligands in hybrid 1.

## 2. Crystal data and structure refinement

Table S1: Crystal data and structure refinement for hybrids **1-3**.

| Identification code                    | <b>1</b>                                                           | <b>2</b>                                                          | <b>3</b>                                                                |
|----------------------------------------|--------------------------------------------------------------------|-------------------------------------------------------------------|-------------------------------------------------------------------------|
| Empirical formula                      | C <sub>20</sub> H <sub>26</sub> CoEuN <sub>8</sub> O <sub>11</sub> | C <sub>20</sub> H <sub>22</sub> CoDyN <sub>8</sub> O <sub>9</sub> | C <sub>20</sub> H <sub>24.5</sub> CoN <sub>8</sub> O <sub>10.5</sub> Sm |
| Formula weight                         | 763.36                                                             | 739.88                                                            | 754.25                                                                  |
| Temperature/K                          | 293(2)                                                             | 293(2)                                                            | 296.15                                                                  |
| Crystal system                         | monoclinic                                                         | monoclinic                                                        | monoclinic                                                              |
| Space group                            | <i>C2/c</i>                                                        | <i>C2/c</i>                                                       | <i>C2/c</i>                                                             |
| <i>a</i> /Å                            | 31.279(4)                                                          | 31.279(5)                                                         | 31.267(2)                                                               |
| <i>b</i> /Å                            | 11.3928(6)                                                         | 11.3714(10)                                                       | 11.4024(6)                                                              |
| <i>c</i> /Å                            | 21.323(3)                                                          | 21.267(4)                                                         | 21.1252(14)                                                             |
| $\alpha$ /°                            | 90                                                                 | 90                                                                | 90                                                                      |
| $\beta$ /°                             | 130.59(2)                                                          | 130.46(3)                                                         | 130.659(2)                                                              |
| $\gamma$ /°                            | 90                                                                 | 90                                                                | 90                                                                      |
| Volume/Å <sup>3</sup>                  | 5770.4(18)                                                         | 5756(2)                                                           | 5713.4(6)                                                               |
| <i>Z</i>                               | 8                                                                  | 8                                                                 | 8                                                                       |
| $\rho_{\text{calc}}$ g/cm <sup>3</sup> | 1.757                                                              | 1.708                                                             | 1.754                                                                   |
| $\mu$ /mm <sup>-1</sup>                | 2.796                                                              | 3.211                                                             | 2.682                                                                   |
| F(000)                                 | 3024.0                                                             | 2904.0                                                            | 2988.0                                                                  |
| Reflections collected                  | 23184                                                              | 22758                                                             | 33182                                                                   |
| Independent reflections                | 6562                                                               | 5090                                                              | 5042                                                                    |
| Data/restraints/parameters             | 6562/0/387                                                         | 5090/7/361                                                        | 5042/2/395                                                              |
| Goodness-of-fit on F <sup>2</sup>      | 1.085                                                              | 1.049                                                             | 1.043                                                                   |
| Final R indexes<br>[I>2 $\sigma$ (I)]  | R <sub>1</sub> = 0.0367,<br>wR <sub>2</sub> = 0.0998               | R <sub>1</sub> = 0.0667,<br>wR <sub>2</sub> = 0.1912              | R <sub>1</sub> = 0.0283,<br>wR <sub>2</sub> = 0.0658                    |
| Final R indexes [all data]             | R <sub>1</sub> = 0.0554,<br>wR <sub>2</sub> = 0.1118               | R <sub>1</sub> = 0.0918,<br>wR <sub>2</sub> = 0.2527              | R <sub>1</sub> = 0.0329,<br>wR <sub>2</sub> = 0.0692                    |

### 3. Infrared spectral analysis

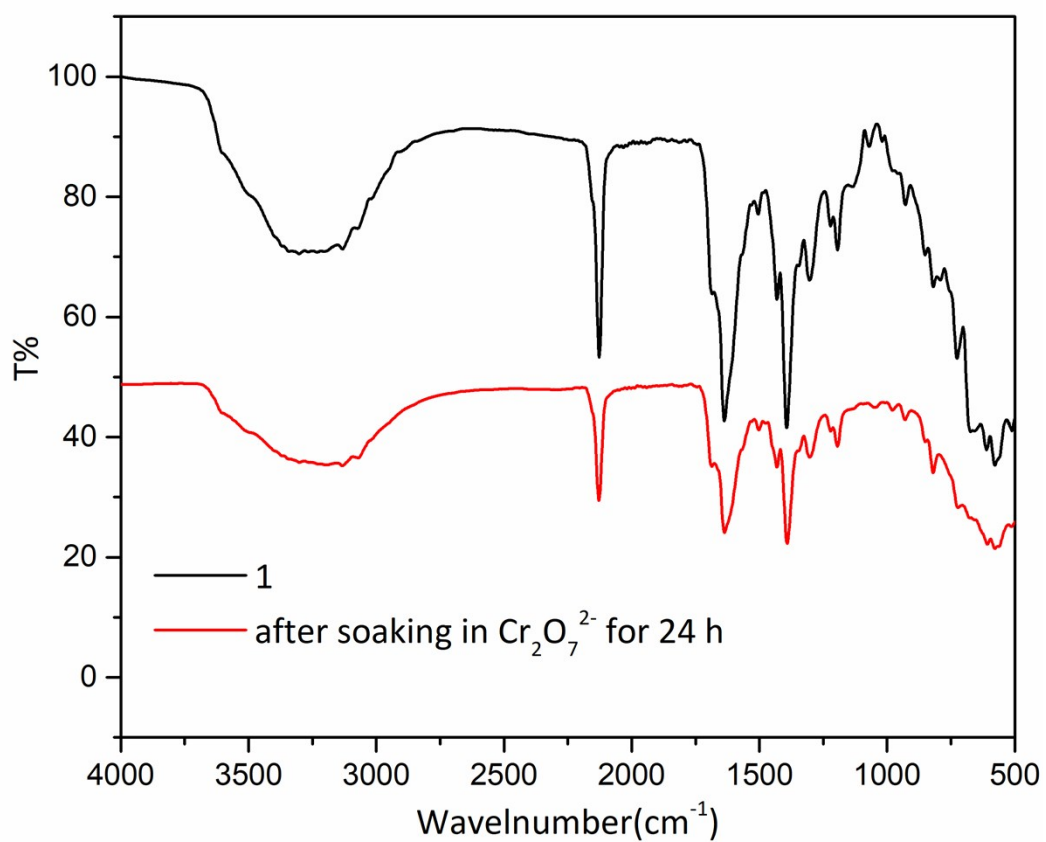

**Figure S3.** Infrared spectrum before and after soaking in  $\text{Cr}_2\text{O}_7^{2-}$  for 24 h of **1**.

#### 4. Thermo-gravimetric analysis (TG)

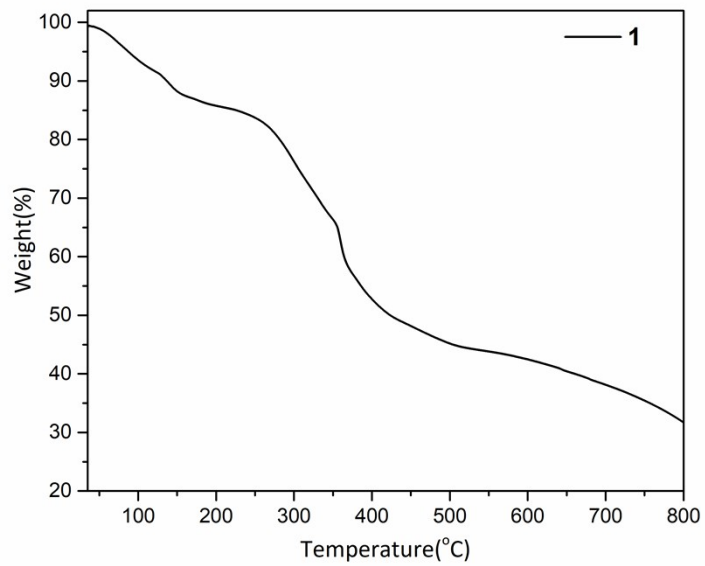

**Figure S4.** The TG curve of **1** under N<sub>2</sub> atmosphere with a heating rate of 10 °C/min.

## 5. X-ray powder diffraction analysis

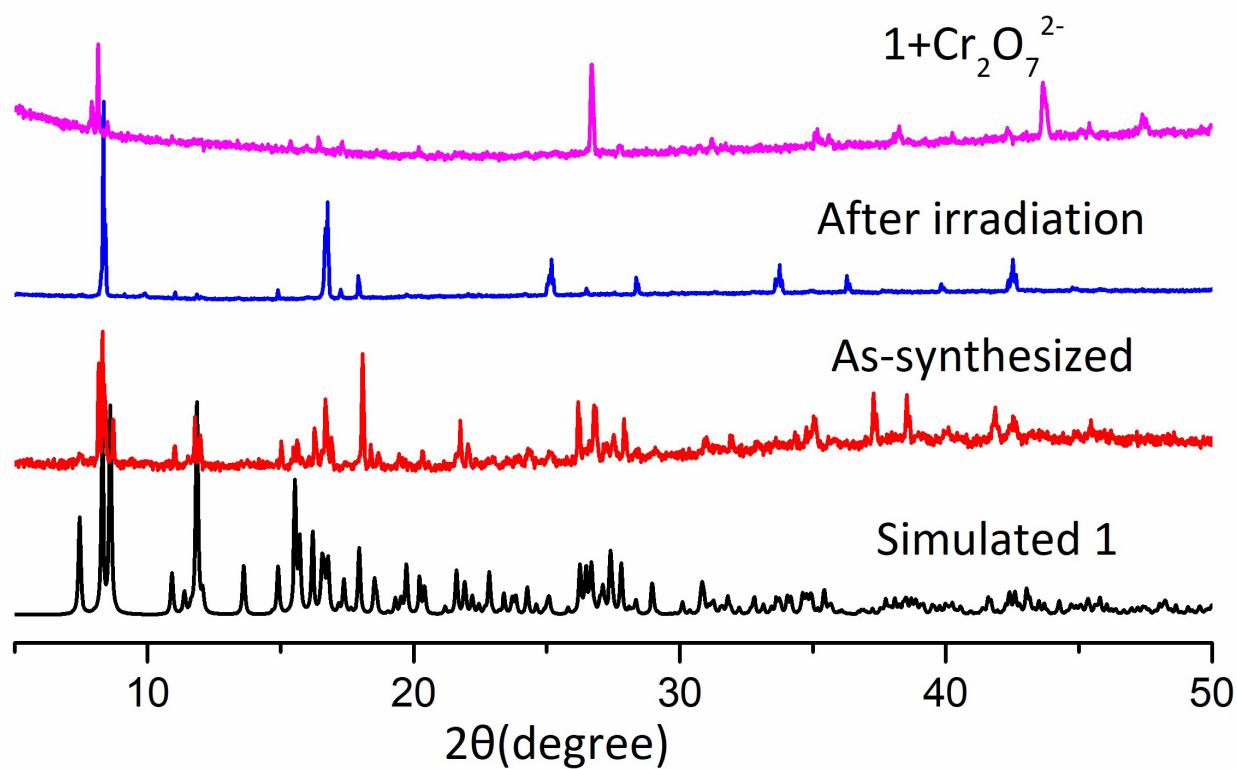

**Figure S5.** PXRD patterns of **1** after the irradiation and soaking in  $\text{Cr}_2\text{O}_7^{2-}$  anion solution for 24 h.

## 6. Luminescence properties and sensing $\text{Cr}_2\text{O}_7^{2-}$

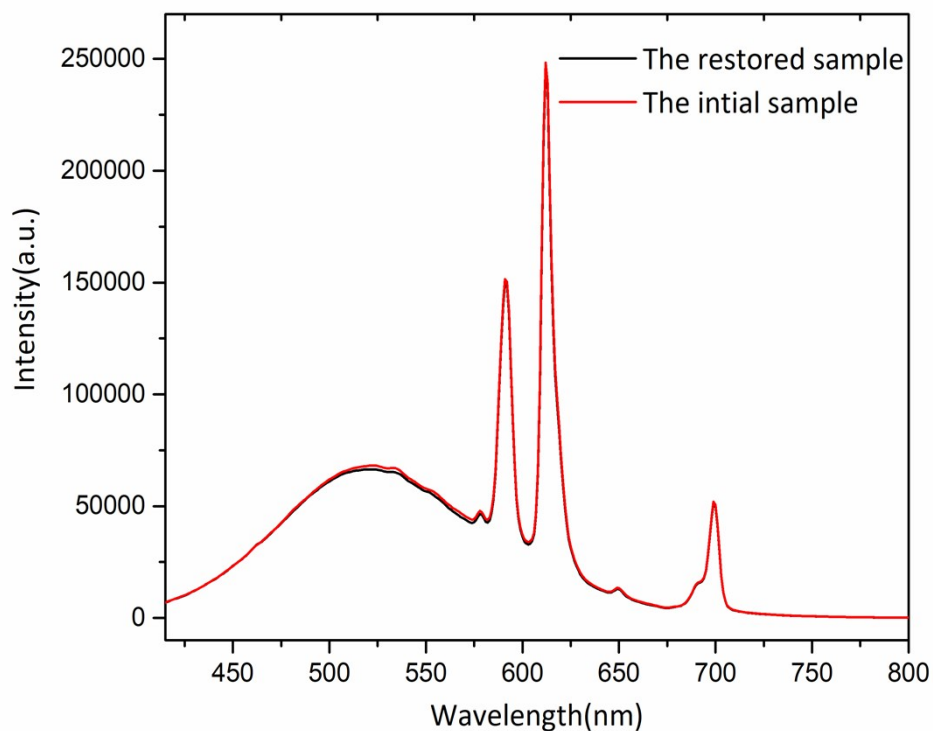

**Figure S6.** The luminescence emission of the original sample and the restored sample.

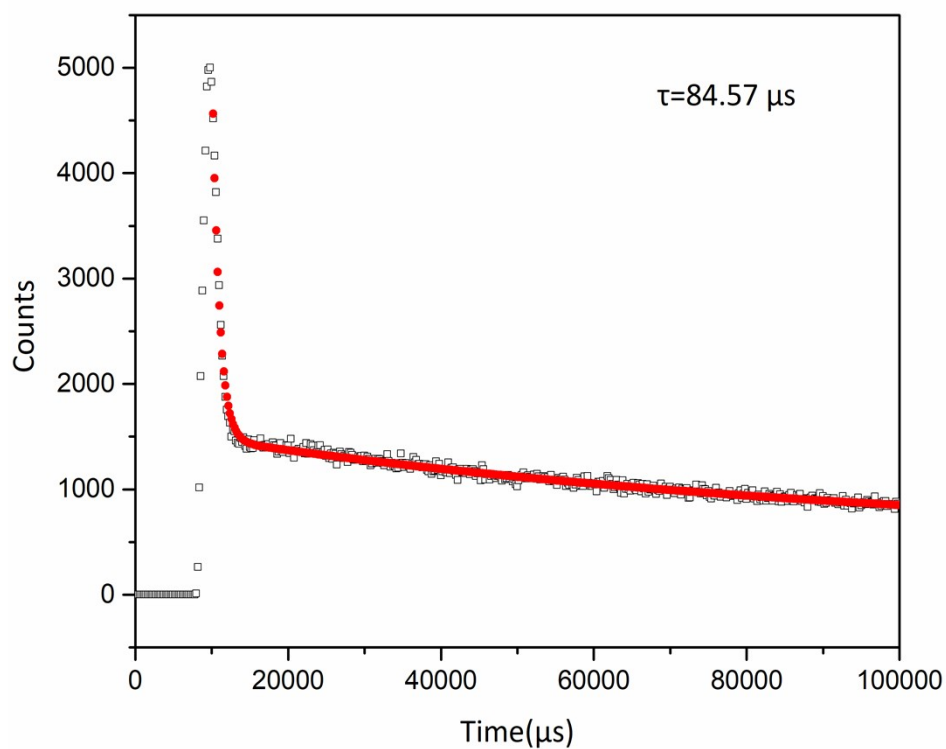

**Figure S7.** Luminescence decays of hybrids **1** under ambient conditions.

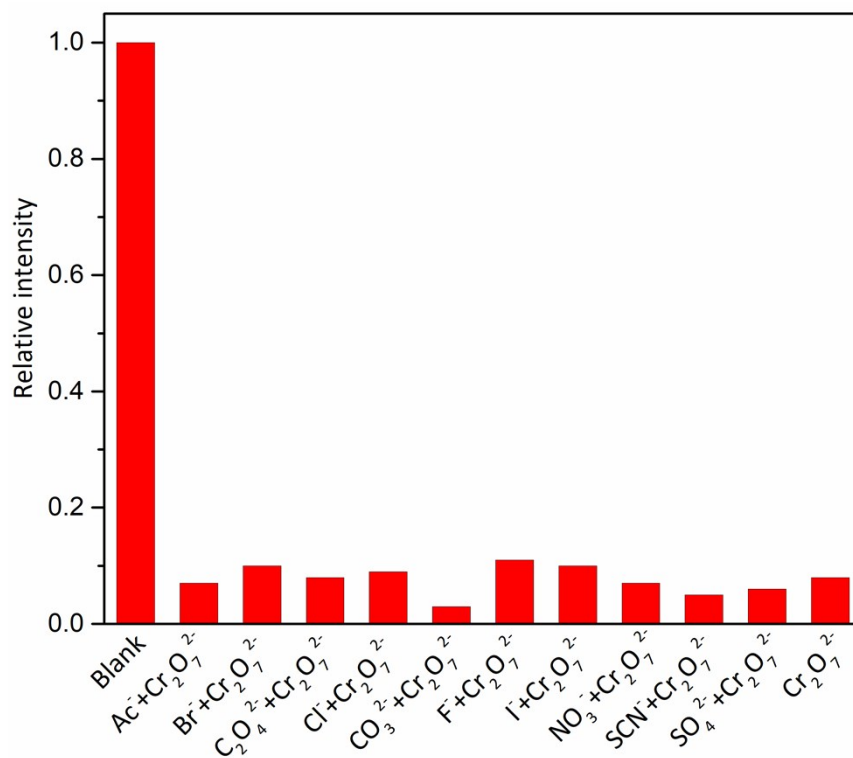

**Figure S8.** Comparison of the relative luminescence intensity of Cr<sub>2</sub>O<sub>7</sub><sup>2-</sup> in the presence of mixed anions for **1**.

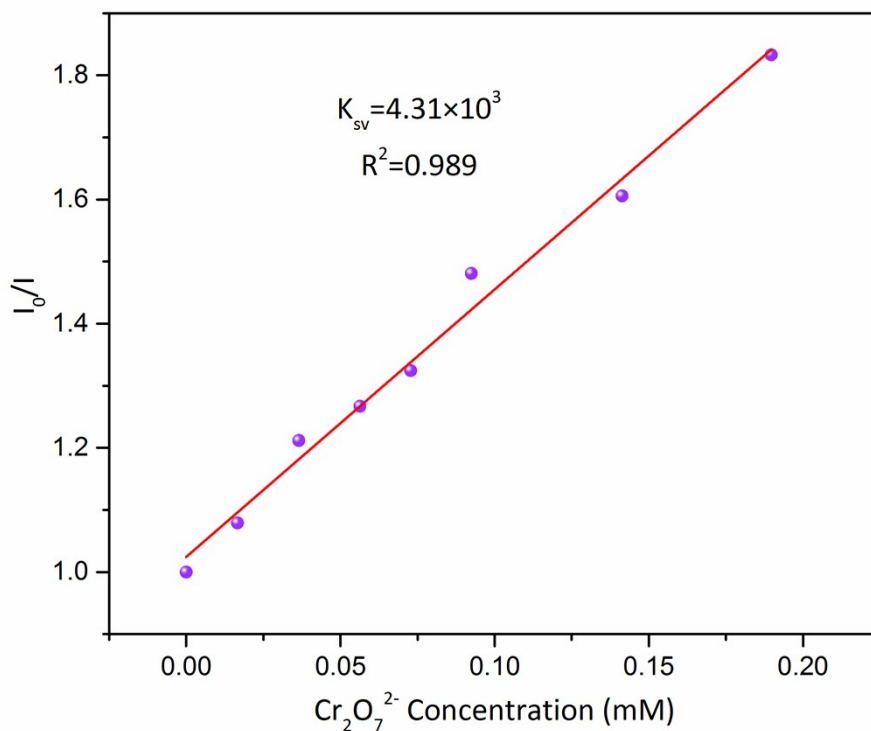

**Figure S9.** The Stern-Volmer plot of quenched by Cr<sub>2</sub>O<sub>7</sub><sup>2-</sup> in CH<sub>3</sub>OH. The red line corresponds to a linear fitting result.



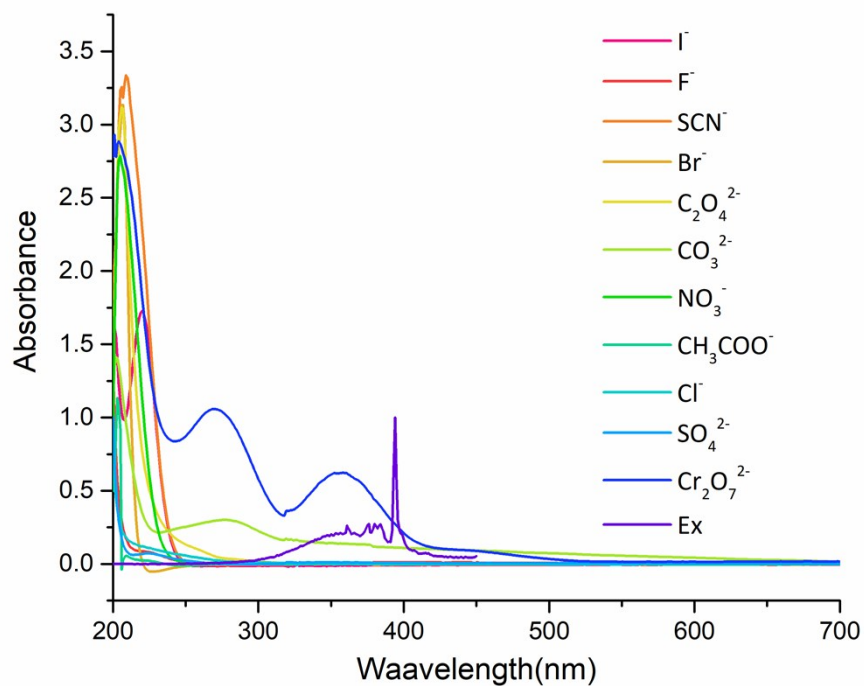

**Fig S10.** The UV-vis absorption spectra of anions and the excitation spectrum of **1**.

## 7. XPS for compound **1**

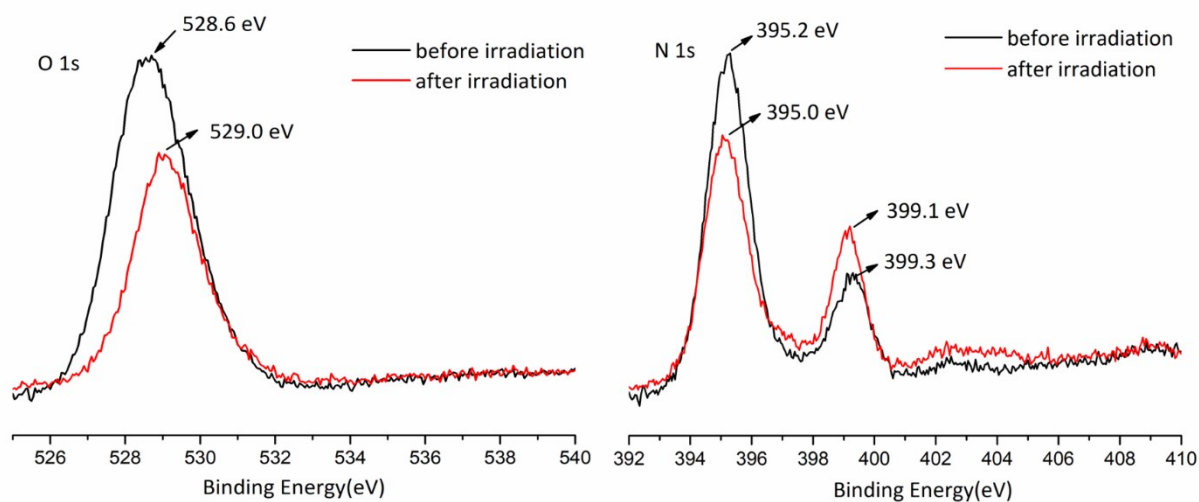

**Fig. S11** XPS core level spectra of O and N atoms in hybrid **1**.

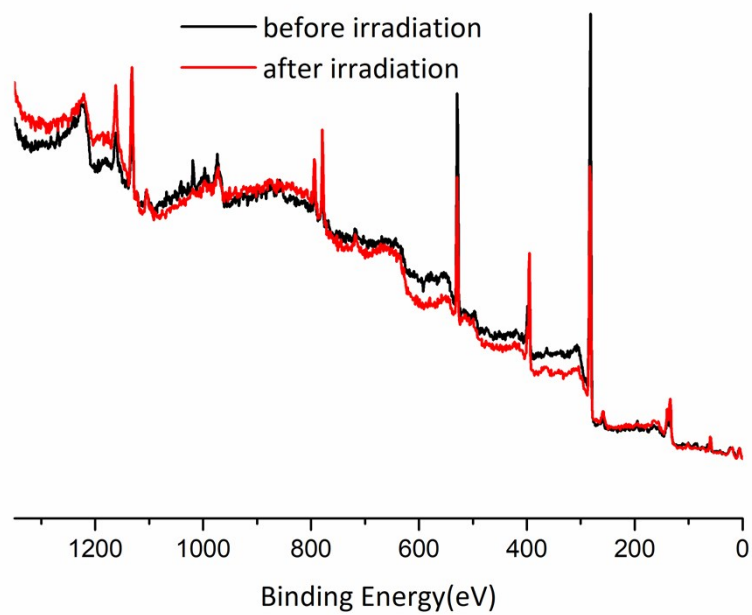

Fig. S12 XPS of hybrid 1.

### 8. EDS analysis of hybrid 1

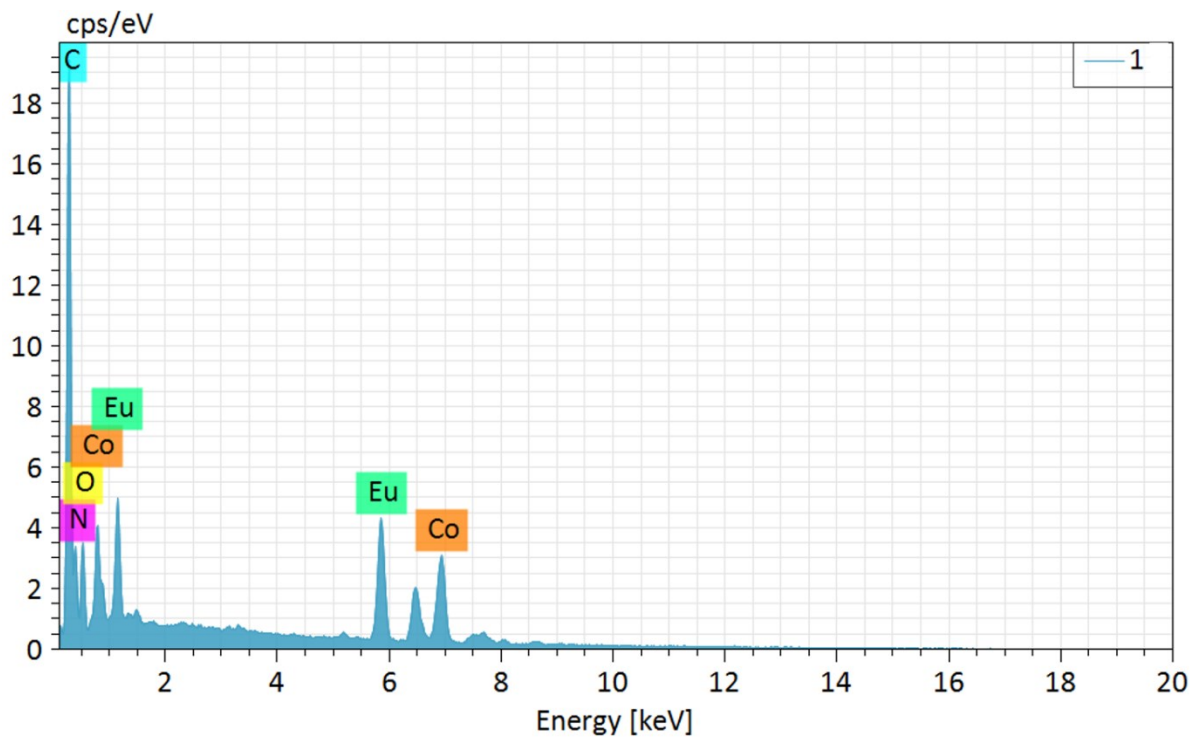

Fig. S13 EDX analysis of hybrid 1.
